# Supplementary material for: Value of Different Comorbidity Indices for Predicting Outcome in Patients with Acute Myeloid Leukemia
Source: PubMed Central journal article supplement (PMC5061362; doi:10.1371/journal.pone.0164587), 2016-10-12
Supplement: pone.0164587.s001.pdf [file pone.0164587.s001.pdf]

**S1 Dataset. The individual patient data.**

| ID | Age | Sex | LDH, U/L | WBC, /L | ECOG | Type | Cytogen | BMB, % | FAB  | Tx | SCT | ED | CR | Status | OS, m  | HCT-CI | CIRS-G | ACE-27 |
|----|-----|-----|----------|---------|------|------|---------|--------|------|----|-----|----|----|--------|--------|--------|--------|--------|
| 1  | 60  | 1   | 576      | 51.60   | N/A  | 1    | N/A     | 41     | M2   | 1  | 1   | 1  | 1  | 2      | 32.85  | 2      | 2      | 0      |
| 2  | 63  | 1   | 1,272    | 3.00    | N/A  | 2    | 3       | 20     | M4   | 1  | 1   | 1  | 2  | 2      | 4.90   | 3      | 3      | 2      |
| 3  | 62  | 2   | 288      | 22.30   | 2    | 2    | N/A     | 50     | M4   | 1  | 1   | 1  | 1  | 2      | 5.88   | 3      | 2      | 2      |
| 4  | 56  | 1   | 282      | 8.60    | N/A  | 2    | N/A     | N/A    | N/A  | 1  | 1   | 1  | 1  | 2      | 36.24  | 3      | 3      | 3      |
| 5  | 39  | 2   | 468      | 15.70   | N/A  | 1    | N/A     | 30     | M1   | 1  | 2   | 1  | 1  | 1      | 181.78 | 2      | 0      | 0      |
| 6  | 57  | 1   | 402      | 1.70    | N/A  | 2    | 2       | 33     | N/A  | 1  | 1   | 1  | 1  | 2      | 26.35  | 3      | 3      | 3      |
| 7  | 71  | 1   | 7,014    | 46.00   | N/A  | 1    | 1       | N/A    | M3   | 1  | 1   | 1  | 1  | 2      | 14.65  | 3      | 2      | 2      |
| 8  | 58  | 2   | 840      | 16.00   | 1    | 1    | 2       | 85     | M4   | 1  | 1   | 1  | 1  | 1      | 148.34 | 2      | 2      | 0      |
| 9  | 63  | 2   | 5,376    | 8.40    | N/A  | 2    | 3       | N/A    | M1   | 1  | 1   | 1  | 1  | 2      | 19.61  | 3      | 2      | 2      |
| 10 | 69  | 2   | 463      | 0.80    | N/A  | 2    | N/A     | 40     | M2   | 2  | 1   | 1  | 2  | 2      | 28.71  | 3      | 2      | 2      |
| 11 | 57  | 1   | 984      | 43.50   | N/A  | 1    | N/A     | 95     | M4   | 1  | 1   | 1  | 1  | 2      | 22.90  | 2      | 2      | 0      |
| 12 | 57  | 1   | 696      | 9.10    | 1    | 1    | 1       | 70     | M4   | 1  | 1   | 1  | 1  | 2      | 22.05  | 3      | 2      | 2      |
| 13 | 59  | 1   | 4,134    | 146.00  | N/A  | 1    | 2       | 55     | M2   | 2  | 1   | 1  | 2  | 2      | 2.86   | 2      | 2      | 0      |
| 14 | 74  | 2   | 480      | 41.60   | 0    | 1    | N/A     | N/A    | M5   | 1  | 1   | 1  | 1  | 3      | 1.81   | 3      | 2      | 2      |
| 15 | 65  | 2   | 708      | 5.40    | 0    | 1    | 2       | 55     | M1/2 | 1  | 1   | 1  | 1  | 2      | 18.07  | 2      | 2      | 1      |
| 16 | 59  | 1   | 1,236    | 13.50   | N/A  | 1    | 2       | 70     | M2/4 | 1  | 1   | 2  | 2  | 2      | 0.46   | 3      | 3      | 2      |
| 17 | 72  | 1   | 1,266    | 2.10    | 1    | 1    | N/A     | N/A    | M1   | 1  | 1   | 1  | 1  | 2      | 7.29   | 3      | 2      | 3      |
| 18 | 59  | 1   | 1,446    | 2.60    | 1    | 1    | 3       | 30     | M4eo | 1  | 1   | 1  | 1  | 2      | 6.41   | 3      | 2      | 1      |
| 19 | 76  | 2   | 594      | 2.10    | 2    | 1    | 2       | 90     | M0   | 1  | 1   | 1  | 1  | 2      | 32.23  | 2      | 2      | 1      |
| 20 | 54  | 2   | 1,460    | 209.90  | 2    | 1    | N/A     | N/A    | M4   | 2  | 1   | 2  | 2  | 2      | 0.23   | 3      | 2      | 2      |
| 21 | 58  | 1   | 1,842    | 74.20   | 0    | 1    | 1       | 50     | M4   | 1  | 1   | 1  | 1  | 1      | 78.06  | 2      | 3      | 3      |
| 22 | 40  | 2   | 576      | 26.80   | N/A  | 1    | 1       | N/A    | M4eo | 1  | 1   | 1  | 1  | 1      | 146.92 | 0      | 0      | 0      |
| 23 | 50  | 2   | N/A      | 7.70    | 1    | 2    | 3       | 100    | M4   | 1  | 1   | 2  | 2  | 2      | 3.06   | 3      | 3      | 2      |
| 24 | 68  | 2   | 624      | 7.98    | N/A  | 1    | N/A     | 85     | M2   | 1  | 1   | 1  | 1  | 2      | 26.38  | 3      | 3      | 2      |
| 25 | 77  | 2   | N/A      | 5.30    | N/A  | 2    | N/A     | N/A    | M5   | 2  | 1   | 2  | 2  | 2      | 0.36   | 3      | 3      | 3      |
| 26 | 32  | 2   | 276      | 2.30    | N/A  | 2    | N/A     | N/A    | M4   | 1  | 1   | 1  | 2  | 2      | 6.74   | 3      | 3      | 3      |
| 27 | 29  | 1   | 738      | 23.90   | 0    | 1    | 3       | N/A    | M4eo | 1  | 1   | 1  | 1  | 3      | 4.30   | 2      | 0      | 0      |
| 28 | 70  | 1   | 330      | 1.70    | 0    | 2    | 2       | 5      | M6   | 2  | 1   | 1  | 2  | 2      | 2.07   | 3      | 3      | 0      |
| 29 | 59  | 2   | 1,080    | 33.70   | 0    | 1    | 2       | 60     | M4   | 1  | 1   | 1  | 1  | 1      | 130.60 | 2      | 2      | 0      |
| 30 | 77  | 2   | 642      | 2.10    | 2    | 2    | 3       | 90     | M2   | 2  | 1   | 1  | 2  | 2      | 5.75   | 3      | 3      | 2      |
| 31 | 48  | 2   | 684      | 1.20    | 0    | 1    | 2       | 86     | M6   | 1  | 1   | 1  | 1  | 3      | 41.13  | 2      | 2      | 0      |
| 32 | 35  | 1   | 1,374    | 20.60   | 0    | 1    | 2       | N/A    | M4   | 1  | 1   | 1  | 1  | 2      | 12.62  | 2      | 0      | 0      |

|    |    |   |       |        |     |   |     |     |      |   |   |   |   |   |        |   |   |   |
|----|----|---|-------|--------|-----|---|-----|-----|------|---|---|---|---|---|--------|---|---|---|
| 33 | 49 | 1 | 636   | 45.30  | 0   | 1 | 2   | N/A | M4   | 1 | 1 | 2 | 2 | 2 | 0.46   | 2 | 2 | 0 |
| 34 | 49 | 1 | 822   | 9.90   | 0   | 2 | N/A | 5   | M4   | 1 | 2 | 1 | 1 | 2 | 17.54  | 3 | 2 | 2 |
| 35 | 71 | 2 | 1,068 | 27.90  | 1   | 2 | 2   | 80  | M4eo | 1 | 1 | 1 | 2 | 2 | 11.89  | 3 | 2 | 2 |
| 36 | 19 | 1 | 1,848 | 28.00  | 0   | 1 | 2   | 80  | M4   | 1 | 1 | 1 | 1 | 3 | 17.74  | 0 | 2 | 1 |
| 37 | 51 | 2 | 2,232 | 33.10  | 1   | 2 | 2   | 75  | M4   | 1 | 1 | 1 | 1 | 3 | 6.67   | 3 | 3 | 2 |
| 38 | 63 | 1 | N/A   | 0.80   | 1   | 2 | 3   | 30  | N/A  | 1 | 1 | 1 | 2 | 2 | 3.25   | 3 | 2 | 2 |
| 39 | 43 | 1 | 1,890 | 7.40   | 0   | 1 | 2   | 40  | M6   | 1 | 2 | 1 | 1 | 3 | 33.81  | 2 | 2 | 0 |
| 40 | 20 | 1 | 564   | 10.10  | 0   | 1 | N/A | 0   | N/A  | 1 | 1 | 1 | 1 | 1 | 92.39  | 2 | 0 | 0 |
| 41 | 69 | 1 | 1,890 | 111.00 | 2   | 1 | N/A | 80  | M2   | 2 | 1 | 1 | 2 | 2 | 0.43   | 3 | 3 | 1 |
| 42 | 33 | 2 | 660   | 17.50  | 0   | 1 | 2   | N/A | M5   | 1 | 1 | 1 | 1 | 1 | 81.71  | 2 | 0 | 0 |
| 43 | 52 | 1 | 648   | 1.10   | 0   | 2 | 2   | 40  | M4   | 1 | 2 | 1 | 1 | 1 | 113.71 | 3 | 3 | 2 |
| 44 | 70 | 1 | N/A   | 163.00 | 1   | 1 | 2   | 90  | M4   | 1 | 1 | 1 | 1 | 2 | 6.28   | 0 | 2 | 1 |
| 45 | 56 | 2 | 1,302 | 45.00  | 1   | 2 | 2   | 30  | M4   | 1 | 2 | 1 | 1 | 3 | 49.87  | 3 | 2 | 2 |
| 46 | 53 | 2 | 1,692 | 8.80   | 1   | 1 | 2   | 80  | M1   | 1 | 1 | 1 | 1 | 3 | 10.02  | 3 | 2 | 2 |
| 47 | 37 | 1 | 708   | 2.10   | 1   | 2 | 2   | 40  | M2   | 1 | 2 | 1 | 1 | 2 | 21.09  | 3 | 2 | 2 |
| 48 | 66 | 1 | 1,026 | 4.00   | 2   | 2 | 2   | 40  | M4   | 1 | 1 | 1 | 2 | 2 | 1.31   | 3 | 3 | 3 |
| 49 | 44 | 1 | 2,700 | 467.00 | 1   | 1 | 2   | 98  | M1   | 1 | 2 | 1 | 1 | 2 | 96.53  | 2 | 0 | 0 |
| 50 | 62 | 2 | 4,758 | 48.70  | N/A | 1 | N/A | 80  | M4   | 1 | 1 | 2 | 2 | 2 | 0.89   | 2 | 2 | 2 |
| 51 | 63 | 1 | 822   | 73.10  | 1   | 1 | N/A | 45  | M2   | 1 | 1 | 1 | 1 | 2 | 15.61  | 2 | 2 | 0 |
| 52 | 61 | 2 | 564   | 2.40   | 1   | 2 | 2   | 30  | M1   | 1 | 1 | 1 | 1 | 2 | 99.25  | 3 | 3 | 2 |
| 53 | 73 | 2 | 486   | 1.00   | 2   | 1 | 3   | 76  | M0/1 | 2 | 1 | 1 | 2 | 2 | 0.16   | 2 | 2 | 2 |
| 54 | 66 | 1 | 1,608 | 96.20  | 1   | 1 | 2   | 45  | M4   | 1 | 1 | 1 | 1 | 3 | 5.52   | 0 | 3 | 1 |
| 55 | 80 | 2 | 1,116 | 60.00  | 1   | 1 | 3   | N/A | M2   | 2 | 1 | 1 | 2 | 2 | 0.00   | 2 | 2 | 2 |
| 56 | 73 | 1 | 1,716 | 1.80   | 2   | 2 | N/A | N/A | M4   | 1 | 1 | 1 | 1 | 2 | 7.85   | 3 | 3 | 2 |
| 57 | 66 | 1 | 299   | 7.50   | 1   | 1 | 1   | 18  | M2   | 1 | 1 | 1 | 1 | 2 | 19.81  | 3 | 3 | 2 |
| 58 | 77 | 2 | 60    | 11.40  | 1   | 1 | 2   | 60  | M2   | 1 | 1 | 1 | 1 | 3 | 20.67  | 2 | 2 | 1 |
| 59 | 69 | 2 | 1,350 | 23.00  | 2   | 2 | N/A | N/A | M4   | 2 | 1 | 1 | 2 | 2 | 0.13   | 3 | 3 | 2 |
| 60 | 68 | 1 | 606   | 11.50  | 1   | 1 | 2   | 90  | M0   | 1 | 1 | 1 | 1 | 3 | 32.62  | 0 | 2 | 0 |
| 61 | 58 | 1 | 230   | 2.70   | 0   | 1 | 3   | 54  | M6   | 1 | 2 | 1 | 1 | 2 | 15.24  | 0 | 2 | 1 |
| 62 | 34 | 2 | 317   | 11.40  | 0   | 1 | 2   | 80  | M2   | 1 | 2 | 1 | 1 | 1 | 96.76  | 2 | 2 | 0 |
| 63 | 69 | 1 | 429   | 0.50   | 1   | 2 | N/A | 30  | N/A  | 2 | 1 | 1 | 2 | 3 | 0.13   | 3 | 2 | 3 |
| 64 | 77 | 2 | 341   | 31.10  | N/A | 2 | 2   | 20  | M5   | 2 | 1 | 1 | 2 | 3 | 23.23  | 3 | 3 | 3 |
| 65 | 48 | 1 | 606   | 4.60   | 1   | 1 | 3   | 40  | M2   | 1 | 2 | 1 | 1 | 2 | 12.29  | 2 | 2 | 2 |
| 66 | 18 | 1 | 1,230 | 16.50  | 1   | 1 | 2   | 80  | M2   | 1 | 1 | 1 | 1 | 3 | 5.62   | 2 | 0 | 0 |
| 67 | 45 | 1 | 420   | 9.30   | 1   | 1 | 2   | 60  | M4   | 1 | 2 | 1 | 1 | 1 | 90.12  | 2 | 2 | 0 |

|     |    |   |       |        |     |   |     |     |     |   |   |   |     |   |       |   |   |   |
|-----|----|---|-------|--------|-----|---|-----|-----|-----|---|---|---|-----|---|-------|---|---|---|
| 68  | 62 | 2 | 288   | 1.00   | 0   | 2 | 2   | 50  | M2  | 1 | 2 | 1 | 1   | 3 | 9.20  | 3 | 3 | 2 |
| 69  | 54 | 2 | 1,477 | 88.41  | 1   | 2 | 3   | 20  | M4  | 1 | 1 | 1 | 2   | 2 | 8.94  | 3 | 3 | 3 |
| 70  | 61 | 2 | 329   | 7.60   | 0   | 1 | 3   | 0   | M4  | 1 | 2 | 1 | 1   | 2 | 4.60  | 3 | 3 | 3 |
| 71  | 90 | 1 | 563   | 45.90  | 3   | 1 | 2   | 40  | M2  | 2 | 1 | 1 | 2   | 2 | 0.36  | 2 | 3 | 3 |
| 72  | 64 | 1 | 372   | 15.00  | N/A | 2 | 2   | 60  | M2  | 1 | 2 | 1 | 1   | 1 | 91.43 | 3 | 2 | 2 |
| 73  | 47 | 2 | 449   | 5.25   | 1   | 2 | 1   | 40  | M2  | 1 | 2 | 1 | 1   | 1 | 69.75 | 3 | 3 | 2 |
| 74  | 68 | 2 | 654   | 3.50   | 1   | 2 | 2   | 80  | M4  | 1 | 2 | 1 | 1   | 1 | 69.39 | 3 | 3 | 2 |
| 75  | 66 | 2 | 754   | 120.00 | 2   | 1 | N/A | 30  | M0  | 1 | 1 | 1 | 2   | 2 | 4.47  | 3 | 3 | 1 |
| 76  | 60 | 2 | 600   | 3.20   | 1   | 1 | 1   | 60  | M3  | 1 | 1 | 1 | N/A | 3 | 0.76  | 3 | 2 | 2 |
| 77  | 75 | 2 | 2,145 | 13.08  | 3   | 1 | 2   | 90  | M4  | 1 | 1 | 2 | 2   | 2 | 0.10  | 3 | 3 | 3 |
| 78  | 72 | 2 | 1,331 | 113.50 | 1   | 1 | 3   | 80  | M2  | 1 | 1 | 1 | 1   | 2 | 17.61 | 2 | 2 | 1 |
| 79  | 76 | 2 | N/A   | 1.61   | 2   | 1 | 3   | N/A | M4  | 1 | 1 | 1 | 1   | 3 | 2.00  | 2 | 3 | 2 |
| 80  | 40 | 2 | 970   | 116.80 | 0   | 1 | 2   | 90  | M4  | 1 | 2 | 1 | 1   | 2 | 6.28  | 3 | 2 | 1 |
| 81  | 67 | 2 | N/A   | 1.78   | 0   | 2 | 3   | 40  | M2  | 1 | 2 | 1 | 1   | 1 | 71.79 | 3 | 2 | 1 |
| 82  | 76 | 2 | 211   | 2.03   | 1   | 2 | N/A | 64  | M1  | 1 | 1 | 1 | 1   | 3 | 61.34 | 0 | 2 | 1 |
| 83  | 63 | 2 | 595   | N/A    | 0   | 1 | 2   | N/A | M2  | 1 | 1 | 1 | 1   | 3 | 54.05 | 0 | 0 | 0 |
| 84  | 69 | 2 | 1,200 | 183.00 | 2   | 1 | 2   | 87  | M2  | 1 | 1 | 1 | 1   | 2 | 37.72 | 3 | 3 | 1 |
| 85  | 68 | 1 | 398   | 134.00 | 0   | 1 | 2   | 90  | M0  | 1 | 1 | 1 | 2   | 2 | 9.20  | 3 | 3 | 1 |
| 86  | 53 | 1 | 678   | 300.00 | 1   | 1 | 2   | 87  | M1  | 1 | 1 | 1 | 1   | 3 | 28.02 | 3 | 2 | 1 |
| 87  | 65 | 2 | N/A   | 150.00 | 1   | 1 | 2   | 0   | M2  | 1 | 2 | 1 | 1   | 1 | 67.81 | 0 | 2 | 1 |
| 88  | 75 | 2 | 482   | 3.97   | 1   | 1 | 2   | 45  | M2  | 1 | 1 | 1 | 2   | 3 | 10.58 | 3 | 3 | 3 |
| 89  | 69 | 1 | 868   | 55.54  | 1   | 2 | 2   | 50  | M5  | 1 | 1 | 1 | 1   | 2 | 12.58 | 3 | 3 | 2 |
| 90  | 65 | 1 | 627   | 125.98 | 2   | 1 | 2   | 83  | M5  | 1 | 1 | 2 | 2   | 2 | 0.10  | 2 | 2 | 1 |
| 91  | 60 | 1 | 224   | 12.57  | 0   | 2 | 3   | 30  | M1  | 1 | 1 | 2 | 2   | 2 | 2.10  | 3 | 3 | 2 |
| 92  | 73 | 1 | 725   | 184.00 | 1   | 1 | 2   | 90  | M2  | 1 | 1 | 1 | 2   | 3 | 4.63  | 2 | 2 | 1 |
| 93  | 79 | 1 | 217   | 4.49   | 1   | 1 | N/A | 80  | N/A | 1 | 1 | 1 | 2   | 3 | 32.39 | 3 | 3 | 3 |
| 94  | 48 | 2 | 644   | 114.10 | 1   | 1 | 2   | 50  | M4  | 1 | 1 | 1 | 1   | 2 | 2.14  | 2 | 2 | 2 |
| 95  | 66 | 2 | 286   | 0.99   | 1   | 1 | 1   | 30  | M2  | 1 | 1 | 1 | 1   | 2 | 29.17 | 2 | 2 | 1 |
| 96  | 79 | 2 | 369   | 49.67  | 0   | 1 | N/A | 100 | M2  | 1 | 1 | 2 | 2   | 2 | 0.92  | 2 | 2 | 2 |
| 97  | 72 | 1 | 334   | 24.06  | 2   | 2 | N/A | 15  | M4  | 1 | 1 | 1 | 1   | 1 | 39.52 | 3 | 3 | 3 |
| 98  | 58 | 2 | 310   | 17.10  | 1   | 1 | 2   | 14  | M2  | 1 | 1 | 1 | 2   | 2 | 8.90  | 3 | 3 | 3 |
| 99  | 67 | 1 | 256   | 2.00   | 1   | 1 | 3   | 40  | M2  | 1 | 2 | 1 | 1   | 2 | 16.62 | 2 | 3 | 1 |
| 100 | 56 | 1 | 206   | 8.53   | 1   | 1 | 1   | 60  | M2  | 1 | 2 | 1 | 1   | 1 | 62.42 | 2 | 2 | 1 |
| 101 | 74 | 1 | 414   | 124.12 | 2   | 2 | N/A | 60  | M4  | 1 | 1 | 1 | 2   | 2 | 3.61  | 3 | 3 | 3 |
| 102 | 75 | 1 | 581   | 13.25  | 0   | 1 | N/A | 40  | M2  | 1 | 1 | 1 | 1   | 1 | 22.67 | 2 | 2 | 1 |

|     |    |   |        |        |   |   |     |     |      |   |   |   |     |   |       |   |   |   |
|-----|----|---|--------|--------|---|---|-----|-----|------|---|---|---|-----|---|-------|---|---|---|
| 103 | 74 | 1 | 955    | 55.36  | 1 | 2 | N/A | 50  | M2   | 1 | 1 | 1 | 2   | 2 | 0.85  | 3 | 3 | 3 |
| 104 | 67 | 1 | 10,312 | 24.93  | 3 | 1 | N/A | 50  | M5   | 1 | 1 | 1 | 2   | 2 | 2.07  | 3 | 3 | 1 |
| 105 | 67 | 2 | 801    | 19.07  | 1 | 1 | 2   | 90  | M4   | 1 | 1 | 1 | 1   | 2 | 8.08  | 2 | 2 | 1 |
| 106 | 67 | 1 | 433    | 24.82  | 1 | 1 | 2   | 90  | M5   | 1 | 1 | 1 | 1   | 2 | 7.56  | 3 | 3 | 3 |
| 107 | 75 | 1 | 248    | 386.00 | 1 | 1 | 2   | 80  | M2   | 1 | 1 | 1 | 1   | 3 | 9.03  | 2 | 2 | 1 |
| 108 | 82 | 2 | 1,478  | 1.30   | 2 | 2 | 2   | 60  | M0   | 2 | 1 | 1 | 1   | 2 | 2.63  | 3 | 3 | 3 |
| 109 | 56 | 1 | 427    | 51.89  | 1 | 1 | 2   | 75  | M2   | 1 | 2 | 1 | 1   | 2 | 10.45 | 2 | 2 | 0 |
| 110 | 64 | 1 | 377    | 7.70   | 1 | 2 | 3   | 30  | N/A  | 1 | 2 | 1 | 1   | 2 | 27.43 | 3 | 3 | 2 |
| 111 | 62 | 2 | 20     | 105.00 | 0 | 2 | 2   | 90  | M2   | 1 | 1 | 1 | 2   | 2 | 25.56 | 2 | 2 | 2 |
| 112 | 65 | 1 | 568    | 175.51 | 1 | 1 | 2   | 75  | M1   | 1 | 1 | 1 | 1   | 1 | 51.58 | 3 | 2 | 0 |
| 113 | 53 | 2 | 323    | 8.41   | 1 | 1 | 1   | 20  | M4   | 1 | 2 | 1 | 1   | 1 | 26.18 | 3 | 3 | 2 |
| 114 | 44 | 2 | 335    | 6.00   | 0 | 2 | 3   | 100 | M7   | 1 | 2 | 1 | 1   | 2 | 4.17  | 3 | 2 | 1 |
| 115 | 69 | 1 | 4,864  | 18.60  | 0 | 2 | 3   | N/A | N/A  | 1 | 1 | 2 | 2   | 2 | 0.16  | 3 | 2 | 2 |
| 116 | 78 | 1 | 514    | 50.81  | 1 | 1 | N/A | 90  | M0   | 1 | 1 | 1 | 1   | 2 | 19.78 | 2 | 2 | 1 |
| 117 | 74 | 2 | 500    | 35.61  | 1 | 2 | N/A | 0   | M4   | 1 | 1 | 1 | 1   | 2 | 16.23 | 3 | 3 | 3 |
| 118 | 52 | 1 | 238    | 2.94   | 0 | 2 | 3   | 70  | M2   | 1 | 2 | 1 | 1   | 2 | 50.66 | 3 | 2 | 2 |
| 119 | 69 | 1 | 2,486  | 202.19 | 0 | 1 | N/A | 90  | M4   | 1 | 1 | 1 | 2   | 2 | 0.03  | 2 | 2 | 2 |
| 120 | 79 | 1 | 997    | 56.16  | 2 | 2 | N/A | N/A | N/A  | 1 | 1 | 2 | 2   | 2 | 1.91  | 3 | 3 | 3 |
| 121 | 81 | 2 | 1,340  | 211.00 | 2 | 2 | 2   | 100 | M2   | 1 | 1 | 1 | N/A | 1 | 6.64  | 3 | 2 | 2 |
| 122 | 42 | 2 | 641    | 32.68  | 1 | 2 | 2   | 76  | M1   | 1 | 1 | 1 | 2   | 2 | 0.76  | 3 | 3 | 3 |
| 123 | 73 | 2 | 574    | 28.80  | 2 | 2 | 2   | 60  | M2   | 1 | 1 | 1 | 1   | 2 | 47.97 | 3 | 3 | 1 |
| 124 | 78 | 1 | 239    | 1.88   | 1 | 2 | 2   | 45  | N/A  | 1 | 1 | 1 | 1   | 2 | 40.08 | 3 | 3 | 3 |
| 125 | 70 | 2 | 868    | 8.82   | 1 | 2 | 3   | 40  | M2   | 1 | 1 | 1 | 1   | 2 | 16.92 | 3 | 3 | 2 |
| 126 | 47 | 2 | 498    | 1.11   | 1 | 1 | 2   | 30  | M2   | 1 | 1 | 1 | 1   | 2 | 15.80 | 3 | 2 | 0 |
| 127 | 72 | 1 | 319    | 16.44  | 1 | 2 | 2   | 40  | M1/2 | 1 | 1 | 1 | 2   | 1 | 10.61 | 3 | 3 | 2 |
| 128 | 72 | 2 | 1,336  | 97.00  | 0 | 1 | N/A | 90  | M5   | 1 | 1 | 2 | 2   | 2 | 0.43  | 3 | 3 | 2 |
| 129 | 53 | 1 | 283    | 10.23  | 1 | 2 | 2   | 5   | M2   | 1 | 1 | 1 | 1   | 1 | 42.41 | 3 | 3 | 3 |
| 130 | 76 | 2 | 2,146  | 28.17  | 3 | 1 | N/A | 95  | M0   | 1 | 1 | 2 | 2   | 2 | 0.43  | 3 | 3 | 2 |
| 131 | 81 | 2 | 1,231  | 42.90  | 1 | 2 | N/A | 66  | M0   | 1 | 1 | 2 | 2   | 2 | 0.62  | 3 | 3 | 2 |
| 132 | 63 | 1 | 555    | 74.00  | 1 | 1 | 2   | 70  | M2   | 1 | 1 | 1 | 1   | 2 | 22.11 | 0 | 3 | 1 |
| 133 | 63 | 2 | 706    | 43.66  | 1 | 1 | 3   | 80  | M2   | 1 | 1 | 1 | 2   | 2 | 10.94 | 0 | 2 | 0 |
| 134 | 67 | 1 | 337    | 24.30  | 1 | 1 | 2   | 89  | M1   | 1 | 2 | 1 | 1   | 1 | 38.57 | 2 | 3 | 0 |
| 135 | 51 | 1 | N/A    | 15.30  | 1 | 1 | 3   | 90  | M5   | 1 | 1 | 1 | 1   | 2 | 9.10  | 2 | 2 | 1 |
| 136 | 79 | 2 | 232    | 23.45  | 1 | 1 | N/A | 80  | M2   | 2 | 1 | 1 | 2   | 2 | 0.99  | 0 | 2 | 0 |
| 137 | 61 | 1 | 1,247  | 38.87  | 0 | 2 | N/A | 80  | M0   | 1 | 1 | 1 | 2   | 2 | 1.77  | 3 | 3 | 2 |

|     |    |   |       |        |     |   |     |     |      |   |   |   |     |   |       |   |   |   |
|-----|----|---|-------|--------|-----|---|-----|-----|------|---|---|---|-----|---|-------|---|---|---|
| 138 | 70 | 1 | 435   | 43.63  | 1   | 1 | N/A | 76  | M4   | 1 | 1 | 1 | 1   | 1 | 36.47 | 3 | 3 | 1 |
| 139 | 49 | 2 | 199   | 1.06   | 0   | 1 | 1   | 24  | M2   | 1 | 1 | 1 | 1   | 1 | 21.26 | 3 | 2 | 2 |
| 140 | 58 | 1 | 1,165 | 19.23  | 1   | 1 | 3   | 55  | M1   | 1 | 1 | 1 | 1   | 2 | 25.03 | 3 | 2 | 1 |
| 141 | 45 | 1 | 340   | 13.23  | 0   | 2 | 2   | 80  | M4   | 1 | 2 | 1 | 1   | 2 | 6.24  | 3 | 2 | 2 |
| 142 | 56 | 2 | 2,005 | 62.57  | 0   | 1 | 1   | 60  | M4   | 1 | 1 | 1 | 1   | 1 | 26.74 | 2 | 2 | 1 |
| 143 | 46 | 2 | N/A   | 2.70   | 0   | 1 | 3   | 24  | M2   | 1 | 2 | 1 | 1   | 1 | 26.45 | 2 | 2 | 0 |
| 144 | 78 | 2 | 262   | 1.34   | 1   | 2 | N/A | 30  | M4   | 1 | 1 | 1 | 1   | 1 | 10.09 | 2 | 2 | 1 |
| 145 | 51 | 2 | 1,567 | 49.18  | N/A | 1 | 2   | 30  | M4   | 1 | 1 | 1 | 1   | 2 | 18.46 | 2 | 2 | 0 |
| 146 | 66 | 1 | 181   | 3.12   | 2   | 2 | 2   | 40  | M0/1 | 1 | 1 | 1 | 1   | 2 | 9.00  | 3 | 3 | 2 |
| 147 | 68 | 2 | 567   | 13.30  | N/A | 1 | 2   | 20  | M2   | 1 | 1 | 1 | 1   | 2 | 1.74  | 3 | 2 | 2 |
| 148 | 66 | 1 | 319   | 35.78  | 0   | 1 | 2   | 90  | M5   | 1 | 2 | 1 | 1   | 2 | 18.79 | 3 | 2 | 1 |
| 149 | 74 | 2 | 2,784 | 21.20  | 1   | 1 | 1   | 100 | M1/2 | 1 | 1 | 1 | 1   | 1 | 3.29  | 3 | 2 | 1 |
| 150 | 64 | 1 | 571   | 162.31 | 2   | 1 | 2   | 50  | M1/2 | 1 | 2 | 1 | 1   | 2 | 13.67 | 2 | 3 | 1 |
| 151 | 69 | 1 | 1,229 | 8.18   | 2   | 1 | N/A | N/A | N/A  | 1 | 1 | 2 | 2   | 2 | 12.62 | 2 | 3 | 1 |
| 152 | 31 | 1 | 229   | 1.60   | 0   | 2 | 2   | 66  | M0   | 1 | 2 | 1 | 1   | 1 | 14.13 | 3 | 2 | 2 |
| 153 | 43 | 1 | N/A   | 22.09  | 1   | 2 | 3   | 20  | M4   | 1 | 1 | 1 | N/A | 1 | 0.99  | 3 | 2 | 2 |
| 154 | 71 | 2 | 636   | 5.86   | 1   | 1 | 1   | 27  | M1/2 | 1 | 1 | 1 | 1   | 2 | 3.48  | 3 | 3 | 2 |
| 155 | 60 | 1 | 3,053 | 36.60  | 1   | 1 | 2   | 100 | M4   | 1 | 1 | 1 | 1   | 2 | 2.73  | 3 | 2 | 0 |
| 156 | 79 | 1 | 370   | 527.00 | N/A | 1 | N/A | 30  | M4   | 2 | 1 | 2 | 2   | 2 | 0.95  | 3 | 0 | 0 |
| 157 | 28 | 1 | 277   | 3.29   | N/A | 1 | 2   | 35  | M2   | 1 | 1 | 1 | 1   | 1 | 23.98 | 2 | 2 | 2 |
| 158 | 64 | 2 | 2,005 | 7.50   | 1   | 1 | 2   | 22  | M0/1 | 1 | 1 | 1 | 1   | 2 | 8.84  | 3 | 3 | 2 |
| 159 | 79 | 2 | 558   | 93.09  | 1   | 1 | N/A | 85  | M1   | 1 | 1 | 1 | 1   | 1 | 3.12  | 3 | 3 | 1 |
| 160 | 66 | 1 | 197   | 1.39   | 0   | 2 | 3   | 52  | M2   | 1 | 2 | 1 | 1   | 1 | 26.25 | 3 | 2 | 2 |
| 161 | 53 | 1 | 221   | 8.02   | 1   | 2 | 3   | 30  | M2   | 1 | 1 | 1 | 1   | 2 | 3.48  | 3 | 2 | 2 |
| 162 | 51 | 2 | 203   | 3.30   | 0   | 2 | 3   | 70  | M1   | 1 | 2 | 1 | 1   | 2 | 3.38  | 3 | 2 | 2 |
| 163 | 31 | 1 | 610   | 33.86  | 0   | 1 | 3   | 80  | M1   | 1 | 2 | 1 | 2   | 1 | 17.45 | 2 | 2 | 0 |
| 164 | 22 | 2 | 279   | 14.92  | 0   | 1 | 1   | 80  | M3   | 1 | 1 | 1 | 1   | 1 | 4.01  | 2 | 0 | 0 |
| 165 | 52 | 2 | 263   | 3.06   | 0   | 1 | 1   | N/A | M6   | 1 | 2 | 1 | 1   | 2 | 10.58 | 3 | 3 | 1 |
| 166 | 52 | 1 | 368   | 130.00 | 1   | 2 | 2   | 56  | M4   | 1 | 2 | 1 | 2   | 2 | 16.49 | 3 | 2 | 2 |
| 167 | 23 | 1 | 215   | 0.76   | 0   | 1 | 3   | 35  | M6   | 1 | 2 | 1 | 1   | 1 | 17.51 | 0 | 0 | 0 |
| 168 | 39 | 2 | 372   | 20.00  | 0   | 1 | 1   | N/A | M3   | 1 | 1 | 1 | 1   | 1 | 15.47 | 3 | 2 | 2 |
| 169 | 75 | 2 | 617   | 9.20   | N/A | 1 | 2   | N/A | N/A  | 1 | 1 | 1 | 1   | 2 | 7.72  | 3 | 2 | 1 |
| 170 | 68 | 2 | 334   | 22.98  | N/A | 1 | N/A | 70  | M5   | 1 | 1 | 1 | 1   | 2 | 6.90  | 2 | 2 | 2 |
| 171 | 53 | 1 | 297   | 4.56   | N/A | 1 | 2   | N/A | N/A  | 1 | 1 | 2 | 2   | 2 | 0.46  | 2 | 2 | 0 |
| 172 | 55 | 2 | 389   | 48.56  | N/A | 1 | 2   | 83  | N/A  | 1 | 1 | 1 | 1   | 1 | 10.78 | 2 | 2 | 0 |

|     |    |   |       |        |     |   |     |     |      |   |   |   |     |   |       |   |   |   |
|-----|----|---|-------|--------|-----|---|-----|-----|------|---|---|---|-----|---|-------|---|---|---|
| 173 | 63 | 1 | 1,485 | 88.05  | N/A | 2 | N/A | 100 | N/A  | 1 | 1 | 2 | 2   | 2 | 0.95  | 3 | 3 | 3 |
| 174 | 62 | 1 | 397   | 145.31 | N/A | 1 | 3   | 80  | M4   | 1 | 2 | 1 | 1   | 1 | 16.03 | 3 | 3 | 1 |
| 175 | 69 | 1 | 550   | 84.56  | N/A | 1 | 3   | 85  | N/A  | 2 | 1 | 1 | N/A | 1 | 0.36  | 2 | 3 | 1 |
| 176 | 78 | 1 | 242   | 1.96   | 0   | 2 | 3   | 50  | M2   | 1 | 1 | 1 | 1   | 1 | 4.76  | 3 | 3 | 2 |
| 177 | 24 | 2 | 148   | 1.86   | 0   | 2 | 3   | 34  | M2   | 1 | 2 | 1 | 1   | 1 | 10.38 | 3 | 3 | 3 |
| 178 | 77 | 2 | 400   | 23.57  | 1   | 1 | N/A | 85  | M2   | 1 | 1 | 1 | 1   | 1 | 8.51  | 3 | 3 | 1 |
| 179 | 31 | 1 | 308   | 1.01   | 0   | 1 | 2   | 90  | M3   | 1 | 1 | 1 | 1   | 1 | 3.75  | 2 | 2 | 0 |
| 180 | 65 | 2 | 472   | 200.00 | 0   | 1 | 2   | 96  | M2   | 1 | 2 | 1 | 1   | 1 | 7.89  | 3 | 3 | 2 |
| 181 | 72 | 2 | 206   | 5.32   | 0   | 2 | 2   | 75  | M2   | 1 | 2 | 1 | 2   | 1 | 9.07  | 3 | 3 | 2 |
| 182 | 38 | 1 | 428   | 37.70  | 0   | 1 | 2   | 60  | M4   | 1 | 1 | 1 | 1   | 1 | 5.26  | 2 | 2 | 0 |
| 183 | 58 | 1 | 545   | 44.85  | 0   | 1 | 2   | 80  | M1/4 | 1 | 2 | 1 | 2   | 1 | 9.59  | 2 | 2 | 1 |
| 184 | 77 | 1 | 311   | 25.00  | 1   | 1 | N/A | 70  | M4   | 1 | 1 | 1 | 1   | 1 | 3.35  | 2 | 3 | 1 |
| 185 | 78 | 2 | 354   | 18.24  | 2   | 2 | N/A | 70  | N/A  | 1 | 1 | 1 | 1   | 1 | 7.52  | 3 | 3 | 2 |
| 186 | 77 | 1 | 252   | 1.80   | 1   | 2 | 2   | 19  | N/A  | 2 | 1 | 1 | 1   | 1 | 2.04  | 3 | 3 | 2 |
| 187 | 73 | 1 | 287   | 14.53  | N/A | 1 | 3   | 60  | M4   | 2 | 1 | 1 | 2   | 2 | 1.31  | 3 | 3 | 1 |
| 188 | 74 | 2 | 479   | 2.00   | N/A | 2 | 2   | 30  | N/A  | 1 | 1 | 1 | 2   | 1 | 5.45  | 3 | 3 | 2 |
| 189 | 69 | 1 | 245   | 19.79  | 0   | 1 | 1   | 90  | M4   | 1 | 1 | 1 | 1   | 1 | 2.69  | 3 | 3 | 2 |
| 190 | 63 | 2 | 1,148 | 37.15  | 1   | 1 | 2   | 80  | M4/5 | 1 | 1 | 1 | 1   | 1 | 3.52  | 3 | 3 | 3 |
| 191 | 59 | 1 | 585   | 152.65 | N/A | 1 | N/A | 85  | M4   | 2 | 1 | 2 | 2   | 2 | 0.23  | 3 | 3 | 2 |
| 192 | 72 | 1 | 608   | 55.81  | N/A | 2 | N/A | 42  | M4   | 1 | 1 | 1 | 2   | 1 | 1.41  | 3 | 3 | 3 |
| 193 | 35 | 1 | 1,113 | 335.00 | N/A | 1 | 1   | 86  | M4   | 1 | 1 | 1 | 2   | 2 | 0.00  | 3 | 2 | 1 |
| 194 | 88 | 1 | 275   | 1.99   | 2   | 2 | 2   | 39  | M4   | 2 | 1 | 1 | 2   | 1 | 0.33  | 3 | 3 | 3 |

LDH, lactate dehydrogenase; WBC, white blood cells; ECOG, Eastern Cooperative Oncology Group; Cytogen, Cytogenetics; BMB, bone marrow blasts; FAB, French-American-British; Tx, therapy regimen; SCT, stem cell transplantation; ED, early death; CR, complete remission; OS, m, overall survival in months; HCT-CI, Hematopoetic cell transplantation comorbidity index; CIRS-G, Cumulative Illness Rating Scale for Geriatrics; ACE-27, Adult Comorbidity Evaluation-27; N/A, not available; Sex, 1= male; 2= female; Type, 1= de novo, 2= secondary; Cytogenetics according to ELN guidelines [1], 1= good; 2= intermediate; 3= poor; Tx, 1= intensive, 2= palliative; SCT, 1= no SCT, 2= SCT; ED, 1= no ED; 2= ED; CR, 1= CR, 2= no CR; Status, 1= alive, 2= death, 3= lost to follow up; HCT-CI, 1= 0; 2= 1-2; 3= 3 and more; CRIS-G, 1= 0, 2= 1-6; 3= >6.
