# Supplementary material for: Value of Different Comorbidity Indices for Predicting Outcome in Patients with Acute Myeloid Leukemia
Source: PubMed Central journal article supplement (PMC5061362; doi:10.1371/journal.pone.0164587), 2016-10-12
Supplement: pone.0164587.s002.pdf [file pone.0164587.s002.pdf]

**Table S1. Association of patient-related, treatment-related and disease-related factors with survival.**

| Variable     |                      | Total no. of patients | Death N (%) | Median survival (months) | <i>p</i> * |
|--------------|----------------------|-----------------------|-------------|--------------------------|------------|
| Age, years   | < 60                 | 75                    | 37 (49.3)   | 25                       | .003       |
|              | ≥ 60                 | 119                   | 119 (63.0)  | 13                       |            |
| Sex          | Male                 | 102                   | 62 (60.8)   | 16                       | .339       |
|              | Female               | 92                    | 50 (54.8)   | 18                       |            |
| ECOG         | 0-1                  | 131                   | 64 (49.9)   | 21                       | .000       |
|              | ≥ 2                  | 29                    | 24 (82.8)   | 4                        |            |
| Regimen      | Intensive CTx        | 173                   | 96 (55.5)   | 19                       | .000       |
|              | Palliative CTx       | 21                    | 16 (76.2)   | 1                        |            |
| SCT          | No                   | 151                   | 94 (62.3)   | 12                       | .000       |
|              | Yes                  | 43                    | 18 (41.9)   | 96                       |            |
| Cytogenetics | Good                 | 19                    | 7 (36.8)    | 29                       | .009       |
|              | Intermediate         | 87                    | 44 (50.6)   | 25                       |            |
|              | Poor                 | 38                    | 26 (68.4)   | 12                       |            |
| AML type     | De novo              | 123                   | 68 (53.3)   | 18                       | .457       |
|              | Secondary            | 71                    | 44 (62.0)   | 16                       |            |
| WBC, /L      | ≤ 30x10 <sup>9</sup> | 123                   | 66 (53.7)   | 21                       | .021       |
|              | > 30x10 <sup>9</sup> | 71                    | 46 (64.8)   | 14                       |            |
| LDH, U/l     | ≤ 700                | 119                   | 58 (48.7)   | 27                       | .000       |
|              | > 700                | 65                    | 49 (75.4)   | 8                        |            |
| BM blast, %  | ≤ 30                 | 37                    | 22 (59.5)   | 17                       | .994       |
|              | > 30                 | 132                   | 72 (54.5)   | 21                       |            |

ECOG, Eastern Cooperative Oncology Group; CTx, chemotherapy; SCT, stem cell transplantation; WBC, white blood cell; LDH, lactate dehydrogenase; BM, bone marrow.

\* *p*-values from univariate long-rank test.
