# Supplementary material for: Value of Different Comorbidity Indices for Predicting Outcome in Patients with Acute Myeloid Leukemia
Source: PubMed Central journal article supplement (PMC5061362; doi:10.1371/journal.pone.0164587), 2016-10-12
Supplement: pone.0164587.s003.pdf [file pone.0164587.s003.pdf]

**Table S2. Multivariate models with factors predicting overall survival for the entire cohort and intensively treated patients with different ACE-groups.**

| Variable              | entire cohort (N=194) |            |          | Intensively treated patients (N=137) |            |          |
|-----------------------|-----------------------|------------|----------|--------------------------------------|------------|----------|
|                       | HR*                   | 95% CI     | <i>p</i> | HR*                                  | 95% CI     | <i>p</i> |
| Age, years            |                       |            |          |                                      |            |          |
| < 60                  | Ref                   |            |          | Ref                                  |            |          |
| ≥ 60                  | 1.43                  | 0.79-2.59  | NS       | 1.14                                 | 0.62-2.11  | NS       |
| ACE-27 score          |                       |            |          |                                      |            |          |
| 0 (no comorbidity)    | Ref                   |            |          | Ref                                  |            |          |
| 1-3 (any comorbidity) | 2.49                  | 1.13-5.49  | .024     | 3.34                                 | 1.47-7.59  | .004     |
| Cytogenetics          |                       |            |          |                                      |            |          |
| Good                  | Ref                   |            |          | Ref                                  |            |          |
| Intermediate          | 1.75                  | 0.65-4.66  | NS       | 2.10                                 | 0.81-5.47  | NS       |
| Poor                  | 4.25                  | 1.58-11.45 | .004     | 4.91                                 | 1.77-13.62 | .002     |
| ECOG                  |                       |            |          |                                      |            |          |
| 0-1                   | Ref                   |            |          | Ref                                  |            |          |
| ≥ 2                   | 2.73                  | 1.36-5.50  | .005     | 1.75                                 | 0.75-4.07  | NS       |
| SCT                   |                       |            |          |                                      |            |          |
| Yes                   | ---                   |            |          | Ref                                  |            |          |
| No                    | ---                   |            |          | 1.94                                 | 1.06-3.54  | .031     |
| LDH, U/l              |                       |            |          |                                      |            |          |
| ≤ 700                 | Ref                   |            |          | Ref                                  |            |          |
| > 700                 | 1.28                  | 0.71-2.32  | NS       | 1.05                                 | 0.53-2.08  | NS       |
| WBC, /L               |                       |            |          |                                      |            |          |
| ≤ 30x10 <sup>9</sup>  | Ref                   |            |          | Ref                                  |            |          |
| > 30x10 <sup>9</sup>  | 1.45                  | 0.84-2.53  | NS       | 1.36                                 | 0.77-2.42  | NS       |

HR, hazard ratio; CI, confidence interval; ACE-27, Adult Comorbidity Evaluation-27; ECOG, Eastern Cooperative Oncology Group; WBC, white blood cell; LDH, lactate dehydrogenase; SCT, stem cell transplantation; NS, not significant; Ref, reference.

--- indicates not applicable

\*HR was adjusted to age, ACE-27, ECOG, cytogenetics, SCT, WBC and LDH.
